# Supplementary material for: Research on the impact of urbanization on Climate and Ecological Environment of World Cultural Heritage Site-- A case study of Fuling Mausoleum in Qing Dynasty
Source: Research Square preprint supplement (doi:10.21203/rs.3.rs-2042578/v1), 2022-09-12
Supplement: Supplementary file 1 [file 1397116618ff24ea9384128d.xlsx]

## Sheet: Sheet1
Table 2 Sensitivity of land use types to ecological threat factors
Land cover type	Habitat	Construction land	Roadways
Waters	0.95	0.5	0.3
Woodland	1	0.85	0.6
Farmland	0.6	0.8	0.8
Other agricultural land	0.8	0.7	0.7
Construction land	0	0	0
