# Supplementary material for: Research on the impact of urbanization on Climate and Ecological Environment of World Cultural Heritage Site-- A case study of Fuling Mausoleum in Qing Dynasty
Source: Research Square preprint supplement (doi:10.21203/rs.3.rs-2042578/v1), 2022-09-12
Supplement: Supplementary file 2 [file 23b98075ba360b6524ab2dfd.xlsx]

## Sheet: Sheet1
Table 4 Transfer matrix of land use change from 2005 to 2020
Particular year	Land cover type	2020
		farmland	woodland	other agricultural land	construction land	waters
2005	farmland	23.15	20.19	8.03	17.4	0.4
	woodland	14.01	25.93	10.45	25.55	1.13
	other agricultural land	11.08	7.76	4.47	7.18	0.13
	construction land	4.24	11.44	12.77	64.95	1.79
	waters	0.27	0.82	0.42	1.38	8.51
