# Supplementary material for: Research on the impact of urbanization on Climate and Ecological Environment of World Cultural Heritage Site-- A case study of Fuling Mausoleum in Qing Dynasty
Source: Research Square preprint supplement (doi:10.21203/rs.3.rs-2042578/v1), 2022-09-12
Supplement: Supplementary file 3 [file 27a2ab39417735ce38df3a64.xlsx]

## Sheet: Sheet1
Table 5 Statistics of habitat quality grade area in the study area from 2005 to 2020
Habitat quality	2005a		2020a		Percentage change	Annual average of percentage change
	Area km2	Percentage	Area km2	Percentage
Low	96.48	0.3404	117.61	0.4149	0.0746	0.005
Moderate	74.59	0.2632	68.76	0.2426	-0.0206	-0.0014
High	112.38	0.3965	97.08	0.3425	-0.054	-0.0036
