# Supplementary material for: Research on the impact of urbanization on Climate and Ecological Environment of World Cultural Heritage Site-- A case study of Fuling Mausoleum in Qing Dynasty
Source: Research Square preprint supplement (doi:10.21203/rs.3.rs-2042578/v1), 2022-09-12
Supplement: Supplementary file 4 [file 6a2e0910d7481ae32509b6ec.xlsx]

## Sheet: Sheet1
Table 3 Land use change from 2005 to 2020
Land cover type	2005a		2020a		Percentage change
	Area km2	Percentage	Area km2	Percentage
farmland	69.17	0.244	52.74	0.1861	-0.058
woodland	77.07	0.2719	66.14	0.2333	-0.0386
other agricultural land	30.62	0.108	36.15	0.1275	0.0195
construction land	95.19	0.3358	116.46	0.4109	0.075
waters	11.39	0.0402	11.97	0.0422	0.002
