# Supplementary material for: Research on the impact of urbanization on Climate and Ecological Environment of World Cultural Heritage Site-- A case study of Fuling Mausoleum in Qing Dynasty
Source: Research Square preprint supplement (doi:10.21203/rs.3.rs-2042578/v1), 2022-09-12
Supplement: Supplementary file 5 [file c0fdcd60327df78350635558.xlsx]

## Sheet: Sheet1
Table 1 Threat factor weight
THREAT	MAX_DIST	WEIGHT	DECAY
Construction land	1	0.9	Exponential
Roadways	0.5	0.6	Linear
